# Supplementary material for: Construction of core-shell hybrid nanoparticles templated by virus-like particles
Source: Royal Society of Chemistry journal article supplement (doi:10.1039/c7ra11310b), 2017-01-01
Supplement: c7ra11310b1.pdf [file c7ra11310b1.pdf]

Supplementary Information

## **Construction of Core-Shell Hybrid Nanoparticles Templated by Cowpea Chlorotic Mottle Virus**

Aijie Liu, Liulin Yang, Martijn Verwegen, Damien Reardon and Jeroen J.L.M. Cornelissen\*

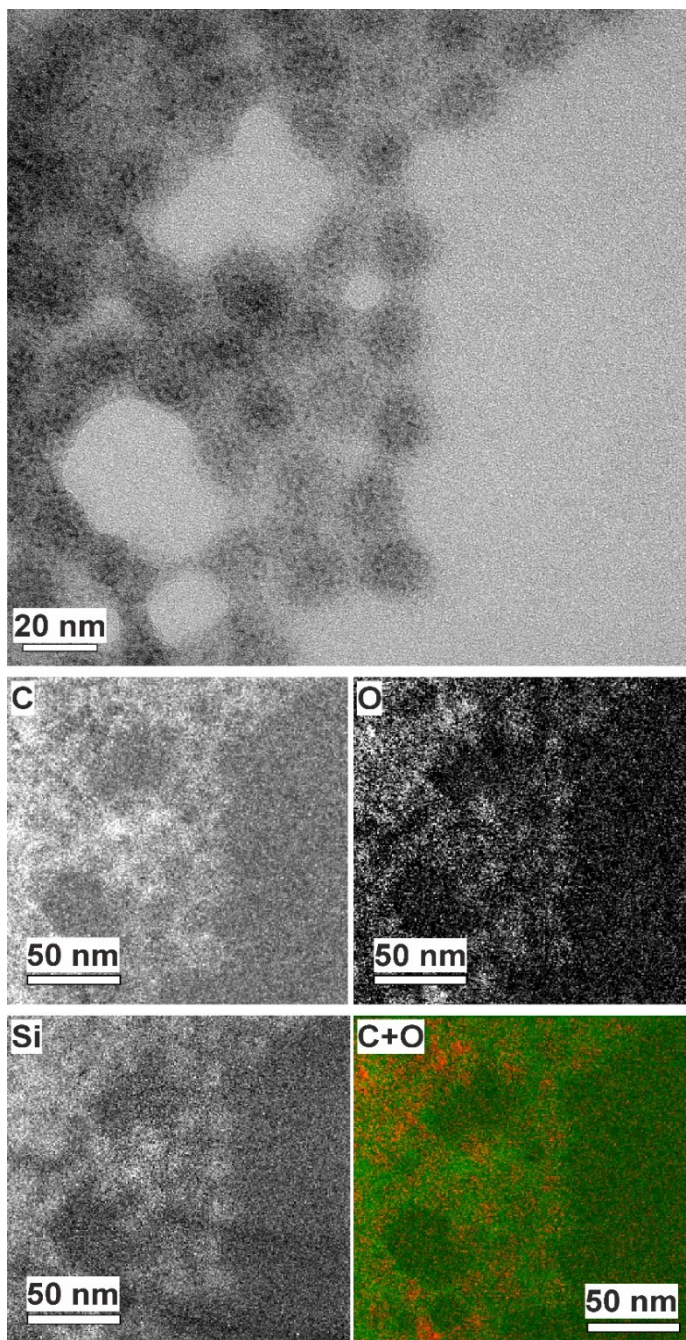

Figure S1. TEM elemental mapping of CCMVSilica4 with staining (a) carbon; (b) oxygen; (c) silicon and (d) overlap of oxygen and carbon.

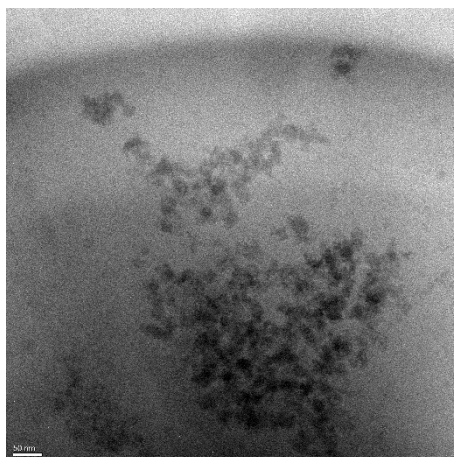

Figure S2. TEM image of CCMVSilica6 after high temperature of calcination under 550 oC for 3 hrs, resulting monodisperse silica nanoparticles with size of 14 nm.

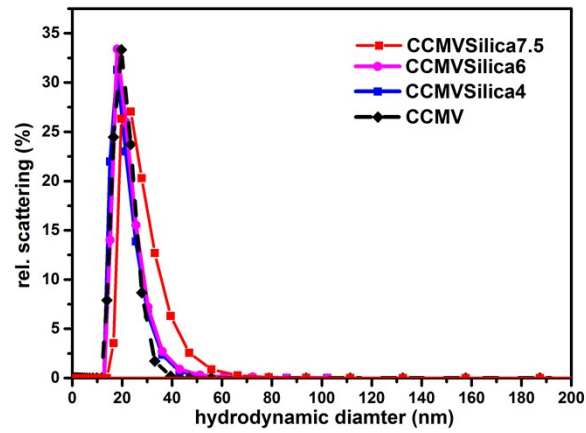

Figure S3. Dynamic light scattering (DLS) analysis of native CCMV, CCMV-silica composite NPs prepared under pH 4 (CCMVSilica4), pH6 (CCMVSilica6) and pH7.5 (CCMVSilica7.5).Figure S4. SDS-PAGE of line1: standard marker; line2: CCMV-Silica4; line3: CCMV-Silica6 and

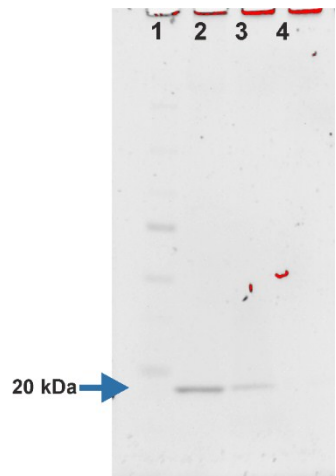

line4: CCMV-Silica7.5.

Figure S4. SDS-PAGE of line1: standard marker; line2: CCMV-Silica4; line3: CCMV-Silica6 and line4: CCMV-Silica7.5.

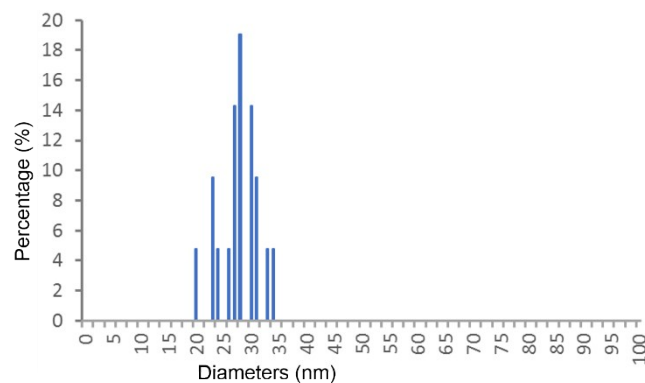

Figure S5. Diameter of CCMV/Au-silica, according to TEM images analyzed by image-J software.

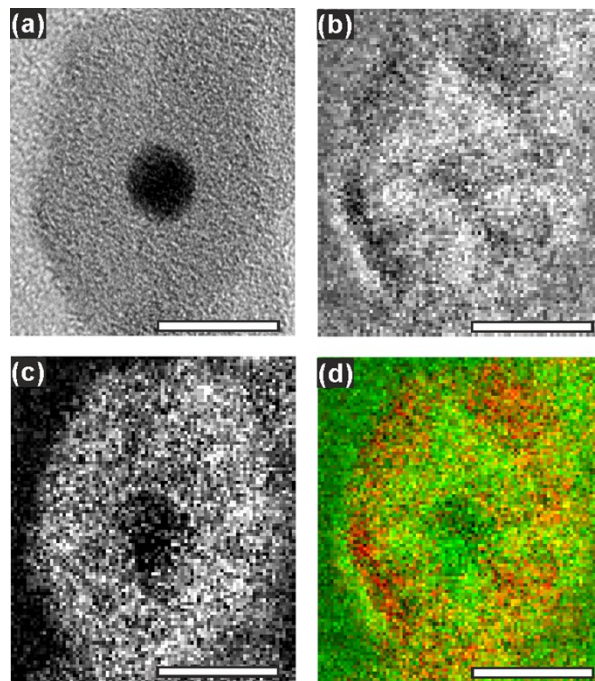

Figure S6. TEM elemental mapping of (a) CCMV/Au-silica nanoparticles; (b) carbon; (c) silicon and (d) composite of red: silicon, green: carbon. Scale bar: 10 nm.

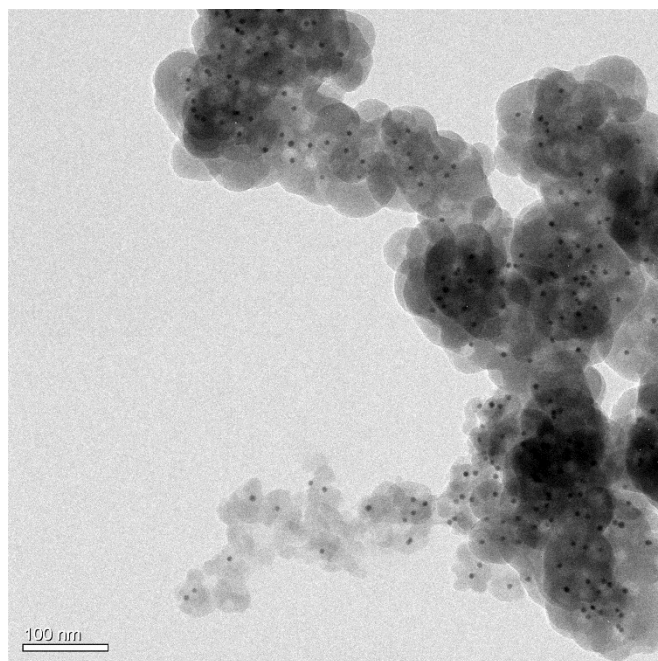

Figure S7. TEM images of (a) CCMV/Au templated silication without tannic acid in MQ
